1  
2  
3  
4  
5  
6  
7  
8  
9  
10  
11  
12  
13  
14  
15  
16  
17  
18  
19  
20  
21  
22  
23  
24  
25  
26  
27  
28

**TITLE PAGE**

**DEVELOPMENT AND VALIDATION OF A PREDICTION RULE FOR BENEFIT AND HARM OF ORAL ANTICOAGULATION IN NON-VALVULAR ATRIAL FIBRILLATION**

**Sergio Raposeiras-Roubin<sup>1,2</sup>, Tze-Fan Chao<sup>3</sup>, Emad Abu-Assi<sup>1,2</sup>, Yi-Hsin Chan<sup>4</sup>,  
Inmaculada González Bermúdez<sup>1,2</sup>, Jo-Nan Liao<sup>3</sup>, Ling Kuo<sup>3</sup>, Rocío González  
Ferreiro<sup>1,2</sup>, Andrés Íñiguez-Romo<sup>1,2</sup>**

(1) Cardiology Department. University Hospital Álvaro Cunqueiro, Vigo, Spain.

(2) Instituto de Investigación Sanitaria Galicia Sur. Vigo, Spain.

(3) Division of Cardiology, Department of Medicine, Taipei Veterans General Hospital and Cardiovascular Research Center, National Yang Ming Chiao Tung University, Taipei, Taiwan

(4) The Cardiovascular Department, Chang Gung Memorial Hospital and College of Medicine, Chang Gung University, Taoyuan, Taiwan

**TOTAL WORD COUNT:** 4370 words

**FUNDING:** None

**DISCLOSURES:** We declare no conflict of interest.

**Address for correspondence:**

**Sergio Raposeiras Roubín**

Cardiology Department. Hospital Álvaro Cunqueiro.

Estrada de Clara Campoamor, 341, 36213 Vigo, Pontevedra, Spain.

Phone: 0034620170387. Fax number: 0034986811111.

<https://orcid.org/0000-0002-6462-4715>

NOTE: This preprint reports new research that has not been certified by peer review and should not be used to guide clinical practice.  
Email: [raposeirasr@ixmail.com](mailto:raposeirasr@ixmail.com), Twitter: @S\_Raposeira

29 **ABSTRACT**

30

31 **Background.** Oral anticoagulation therapy (OAC) remains the gold standard for  
32 stroke prevention in patients with atrial fibrillation (AF). In real life, there are patients who do  
33 not receive OAC due to high bleeding risk. In those patients, left atrial appendage closure  
34 (LAAC) has emerged as a potential alternative for stroke prevention. With this study, we  
35 aimed to develop a clinical decision tool to identify patients expected to derive harm vs  
36 benefit from OAC therapy.

37 **Methods.** Among 14,915 AF patients with CHA<sub>2</sub>DS<sub>2</sub>-VASc  $\geq 1$  (2 for women) from  
38 CardioCHUVI-AF registry (78% with OAC), a prediction rule was derived using a linear  
39 regression model to predict the stroke-bleeding balance. This rule was externally validated in  
40 the Taiwan AF registry, with 26,595 patients (70.5% with non OAC therapy).

41 **Results.** A simplified risk score was created using 7 clinical variables. The low-score  
42 group ( $\leq -8$  points) was associated with higher rates of bleeding than stroke (7.25 vs 1.11 and  
43 3.27 vs 2.58 per 100 patients/year in derivation and validation cohorts, respectively;  $p < 0.001$ ).  
44 In those patients, OAC was harmful. In contrast, high-score group ( $\geq +6$  points) was  
45 associated with higher stroke risk than bleeding risk (2.32 vs 1.71 and 4.19 vs 1.64 per 100  
46 patients/year in derivation and validation cohorts, respectively;  $p < 0.001$ ), with great benefit of  
47 OAC therapy.

48 **Conclusions.** A prediction rule balancing stroke and bleeding risks correctly identify  
49 patients with harm vs benefit from OAC therapy. This rule requires further prospective  
50 evaluation to assess potential effects on patient care to select candidates for LAAC.

51

52

**KEYWORDS**

53

54 Atrial fibrillation; Bleeding; Ischemic Stroke; Oral Anticoagulation; Score.

55

56

57

58

59

60

61

62

63

64

65

66

67

68

69

70

71

72

## **CLINICAL PERSPECTIVE**

73

### **74 What is new?**

75 • We developed and externally validated a simple user-friendly clinical tool -OAC  
76 score- to balance both embolic and bleeding risks in atrial fibrillation patients with  
77 CHA2DS2-VASC  $\geq 1$  (excluding female sex).

78 • According to OAC score, we can identify atrial fibrillation patients expected to derive  
79 benefit vs harm from anticoagulation therapy.

80 • Patients with a low OAC score have much higher rates of bleeding than stroke, which  
81 is exaggerated with anticoagulation. The opposite occurs in patients with a high score.

82

### **83 What are the clinical implications?**

84 • A standardised stratification of both stroke and bleeding risk in atrial fibrillation  
85 patients at high embolic risk can be performed using an user-friendly, comprehensive  
86 tool (the OAC score) .

87 • In patients with low risk OAC score, despite high risk CHA2DS2-VASC,  
88 anticoagulation is not beneficial and left atrial appendage closure could be an  
89 alternative.

90 • Further studies are needed to assess the impact of oral anticoagulation and left atrial  
91 appendage closure in patients with atrial fibrillation according to the OAC score risk  
92 groups.

93

94

## **ABBREVIATIONS**

95

96 **AF:** Atrial Fibrillation

97 **CKD:** Chronic Kidney Disease

98 **HCM:** Hypertrophic Cardiomyopathy

99 **IS:** Ischemic Stroke

100 **LAAC:** Left Atrial Appendage Closure

101 **MB:** Major Bleeding

102 **OAC:** Oral Anticoagulation

103

104

105

106

107

108

109

110

111

112

113

114

## **TEXT**

### **115 INTRODUCTION**

116 The CHA<sub>2</sub>DS<sub>2</sub>-VASc score has a great clinical impact to select patients with atrial fibrillation  
117 (AF) at high embolic risk in order to establish the indication for oral anticoagulation  
118 (OAC)(1, 2). Use of OAC in patients with  $\geq 1$  non-sex CHA<sub>2</sub>DS<sub>2</sub>-VASc risk factor  
119 significantly reduces the chances of thromboembolic cardiovascular events, such as stroke,  
120 and mortality in AF patients(3). However, the clinical benefit of anticoagulant treatment is  
121 offset by the risk of bleeding. Data from the PREFER-AF(4), GARDFIELD-AF(5), and  
122 NCDR-PINNACLE(6) studies, show that 20%, 30%, and 40% of the patients with AF and a  
123 CHA<sub>2</sub>DS<sub>2</sub>-VASc score  $\geq 2$  are not treated with OAC, respectively. A perceived increased  
124 bleeding risk is the most frequent reason for withholding OAC for embolic prevention in non-  
125 valvular AF(7). Although guidelines recommend the use of bleeding risk scores –e. g. HAS-  
126 BLEED–, those scores do not determine OAC prescription; they only help to identify  
127 potentially reversible bleeding risk factors in order to correct them(8).

128 Due to an overlap of risk factors for bleeding and stroke, patients with AF are more usually at  
129 an increased bleeding risk (9). Decision-making regarding anticoagulation can be particularly  
130 challenging in these patients, especially when both stroke and bleeding risks are high. Left  
131 atrial appendage closure (LAAC) could be a reasonable option for those patients, especially  
132 when the expected risk associated with OAC is greater than the expected benefit (10). To  
133 guide clinical decision-making for patients at high risk of stroke and AF, we designed this  
134 study focused on identifying factors that predict whether the expected increase in MB  
135 associated with OAC would outweigh the expected benefit of reduced IS for individual  
136 patients. Those factors will be used to develop a decision tool to help select AF patients  
137 without net benefit from OAC who are candidates for LAAC.

## 138 **METHODS**

139 **Study population.** A retrospective registry-based cohort study including all consecutive  
140 patients (n=16,202) with a diagnosis of AF between January 2014 and January 2018 in the  
141 health area of Vigo (Galicia, Spain) was used (*CardioCHUVI-AF* registry; ClinicalTrials.gov  
142 identifier: NCT04364516)(11). Patients were identified through administrative databases at  
143 both the hospital and ambulatory level, using the regional electronic healthcare records  
144 system. Electronic medical records were reviewed in all patients, and diagnosis of AF was  
145 confirmed by a compatible electrocardiogram. Clinical, laboratory, and therapeutic data were  
146 collected using an encoded database. Patients with missing baseline and follow-up data were  
147 excluded (n=146), together with those with valvular AF (moderate-severe mitral stenosis or  
148 mechanical prosthesis valve; n=350). Patients without none non-sex CHA<sub>2</sub>DS<sub>2</sub>-VASc risk  
149 factor (n=791) were also excluded. Therefore, the final cohort comprised 14,915 AF patients  
150 with CHA<sub>2</sub>DS<sub>2</sub>-VASc  $\geq 1$  for men and  $\geq 2$  for women. The study was conducted in  
151 accordance with the principles of the Declaration of Helsinki and was approved by the local  
152 ethics committee (*Autonomous Committee of Research Ethics of Galicia*, code HAC-ACO-  
153 2018-01, registry 2018/258).

154 **Study Goals.** The goal of this study was to identify clinical variables that determine whether  
155 a patient's bleeding risk is lower or higher than the embolic risk, in order to distinguish  
156 patients who can derive the greatest benefit from those who can experience the most harm  
157 from OAC therapy. Considering individual patient characteristics and their independent  
158 associations with Ischemic Stroke (IS) and Major Bleeding (MB), this study sought to stratify  
159 outcomes based on a single multivariable risk score. This entailed (1) identifying factors  
160 associated with IS and MB, (2) choosing those that selectively predicted either IS or MB to  
161 generate a simplified risk score, and (3) assessing the OAC therapy results observed in the  
162 registry, stratified by the new risk score. An ideal score would identify patients with

163 simultaneous high stroke risk (and corresponding high benefit with OAC therapy) and low  
164 bleeding risk (and corresponding low risk of harm with OAC therapy), and vice versa. In  
165 addition, the ability of the score to balance both IS and MB risks within an external sample  
166 was assessed, using the Taiwan AF registry with 26,595 patients with AF and CHA<sub>2</sub>DS<sub>2</sub>-  
167 VASc score  $\geq 1$  for men or  $\geq 2$  for women.

168 **Embolic and Bleeding End Points.** The primary embolic end point was IS (as defined by the  
169 Standardized Data Collection for CV Trials Initiative and the US Food and Drug  
170 Administration)(12), and the primary bleeding end point was MB (as defined by the  
171 International Society on Thrombosis and Haemostasis)(13). During the follow-up, two data  
172 managers independently reviewed the clinical history of each patient to identify possible  
173 events. All suspected events were independently reviewed by 2 specialists in the clinically  
174 relevant areas of cardiology and internal medicine. Both data managers and specialists  
175 underwent a study-specific training on event definitions and the adjudication process. Finally,  
176 an independent clinical events committee revised and adjudicated all events.

## 177 **Statistical Analysis**

178 Development of Stroke and Bleeding Risk Models. Clinical characteristics were compared  
179 between patients experiencing events during follow-up and those without events, using Fisher  
180 exact or t tests as appropriate. Cox regression was used to develop 2 separate models: the first  
181 to predict IS and the second to predict MB. Data were censored at the time of IS or MB, or at  
182 the time of death, change in OAC therapy status, or last known contact, whichever was  
183 earliest. A total of 40 candidate variables potentially associated with IS or MBs based on a  
184 comprehensive literature review and clinical plausibility were identified (Table 1). Candidate  
185 variables that differed in bivariable comparisons at a significance level  $\leq 0.150$  were  
186 incorporated. Stepwise selection was then performed, using the 0.050 significance level. To  
187 identify possible heterogeneous treatment effects, simple Cox regression models were



188 developed for each outcome including treatment group, variable of interest, and their  
189 interaction term. Interactions terms significant at a P value  $\leq 0.100$  were entered into the  
190 stepwise selection process with other candidate variables. Proportionality was evaluated for  
191 all variables in the models. Model discrimination was assessed using Harrell's c-statistic, and  
192 calibration with the Gronnesby and Borgan goodness-of-fit test.

193 Development of a Simplified Clinical Prediction Score. For each patient, the predicted risks  
194 (cumulative incidence) of IS and MB were estimated, assuming OAC therapy and separately  
195 assuming non-OAC therapy. The difference between these 2 predicted values represented the  
196 predicted balance between IS and MB. A linear regression model was created, using the  
197 predicted balance between IS and MB –as the outcome– and all predictors that were selected  
198 in the stroke and bleeding models. Baseline variables that statistically accounted for more  
199 than 1% of the observed variation in estimated balance between IS and MB were included in a  
200 simplified clinical prediction score, called OAC score. All variables were assigned an integer  
201 score of 1 or 2 (or  $-1$  to  $-2$ ) based on  $\beta$  coefficients. The range of potential scores was  
202 between  $-22$  and  $10$ . Clinically relevant score groupings were created, defining patients more  
203 likely to be harmed from OAC (low score group) vs those more likely to benefit (moderate-  
204 high score groups). Low score was defined as percentile 10 of patients with negative OAC  
205 score values (i.e. a score  $\leq -8$ ), and high score as percentile 90 of patients with positive OAC  
206 score values (i.e. a score  $\geq 6$ ). Kaplan-Meier event rates were compared by score groups, and  
207 absolute risk differences in IS and MB rates across score groups were assessed. Statistical  
208 analyses were conducted using *STATA* software, version 15 (Stata Corp, College Station,  
209 Texas, USA).

210

211

## 212 RESULTS

213 **Derivation cohort.** A total of 14,915 patients with AF and CHA<sub>2</sub>DS<sub>2</sub>-VASc  $\geq 1$  for men or  
214  $\geq 2$  for women were included in this analysis (derivation cohort). Of these, 11,632 patients  
215 (78.0%) receiving OAC (86.8% VKA, 13.2% DOAC). During a mean follow up of 4.0 years  
216 (IQR 2.4-5.7 years), 801 patients developed IS (1.3 per 100 patients/year) and 1,247 patients  
217 developed MB (2.1 per 100 patients/year). Patients who had an IS during follow-up were  
218 older, more likely women, had higher rates of prior stroke, aortic stenosis, hypertrophic  
219 cardiomyopathy (HCM), chronic kidney disease (CKD), history of cancer and dementia, and  
220 were less likely to have been treated with OAC compared with patients without an IS (Table  
221 1). Patients with a MB were also older, more likely men, had a higher prevalence of smoking,  
222 enolism, and diabetes, had a higher prevalence of cardiovascular disease (including prior heart  
223 failure and valvular heart disease), higher comorbidity (including dementia, malnutrition,  
224 liver disease, CKD, anemia, trombopenia and prior bleeding admission), and were more likely  
225 to have treated with OAC, corticosteroids and NSAIDs compared with patients without a MB  
226 (Table 1).

227 **Risk Prediction Models.** In multivariable Cox regression (Table 2), significant predictors of  
228 both IS and MB included age, aortic stenosis, dementia, and permanent AF. Variables that  
229 predicted only the risk of IS included prior stroke and HCM. Male sex, smoking, diabetes  
230 mellitus, mitral regurgitation, CKD, liver disease, anemia, prior bleeding admission, prior  
231 gastrointestinal ulcer, malnutrition, and corticosteroid/NSAID use were significant  
232 independent predictors of MB, but not of IS. Both models had moderate discrimination (c  
233 statistic 0.687 and 0.671 for stroke and bleeding models, respectively), and were well  
234 calibrated (goodness-of-fit P = 0.116 and 0.549 for stroke and bleeding models, respectively).

235 **Clinical Prediction Score.** A simplified risk score –called OAC score– was created using 7  
236 clinical variables (age, sex, prior stroke, prior bleeding, anemia, renal function, and liver

237 function) that were independently associated with more than 1% of the variation in the  
238 balance between IS and MB in a linear regression model (**Supplementary Table 1**). The score,  
239 ranging from -22 to 10, assigned points as follows: for patients younger than 60 years, 0  
240 points; for age 60 to 69,+1; for age 70 to 79,+2; for age 80 to 89,+3; for patients 90 years or  
241 older,+4; for female sex, +3; for prior stroke, +4; for CKD stage 5, -11; for non-cirrhotic liver  
242 disease (ALT or AST > 3 USL), - 6 points; for cirrhotic liver disease, -10 points; for  
243 hemoglobin 10 to 11.9 g/dL, -5 points; for hemoglobin lower than 10 g/dL, -9 points; for prior  
244 bleeding admission, -4 points. Patients were classified in 3 risk groups according to OAC  
245 score: low ( $\leq - 8$  points; n=242, 1.6%), moderate (from -8 to +6 points; n=11,264, 75.5%),  
246 and high score ( $\geq + 6$  points; n=3,409, 22.9%). The low-score group was associated with the  
247 highest rates of MB and the most negative balance between IS and MB, whereas the opposite  
248 occurred in the high-score group (**Figure 1**). Kaplan Meier curves for MB and IS according  
249 the 3 risk groups are showed in **Figure 2A and 2B**. The impact of OAC therapy in stroke-  
250 bleeding balance is shown in **Figure 3A**.

251 **External validation of OAC score.** OAC score was validated in a Nationwide Cohort Study  
252 from Taiwan, using the National Health Insurance Research Database in Taiwan(14). Among  
253 the patients of Taiwan AF registry with CHA2DS2-VASc  $\geq 1$  (2 for women), data of OAC  
254 score were available in 26,595 patients. From them, only 29.5% were treated with OAC  
255 therapy. OAC risk score was independently associated with the balance of embolic-  
256 hemorrhagic risk (**Figure 4**). According to the OAC score, 19.7%, 74.0%, and 6.3% of  
257 patients are classified as low, moderate, and high score. A high OAC score is associated with  
258 more IS whereas a low OAC risk score is associated with more MB (**Figures 5A and 5B**).  
259 Only patients with a low OAC risk score had a negative embolic-hemorrhagic balance, that  
260 was exaggerated in anticoagulated patients (**Figure 3B**).

261  
262  
263  
264  
265  
266  
267  
268  
269  
270  
271  
272  
273  
274  
275  
276  
277  
278  
279  
280  
281  
282  
283  
284  
285

## DISCUSSION

This study developed and validated a clinical prediction score based on embolic and bleeding risk factors to help physicians to identify AF patients with greater expected harm vs greater expected benefit from OAC therapy. Despite prior evidence suggesting that embolic and bleeding risk are strongly correlated, our results suggest that it may be possible to identify individual patients with discordant embolic risks and bleeding risks.

In patients with a low OAC score (i.e.,  $\leq -8$  points), the risk of bleeding events was clearly higher than the risk of embolic events in both the derivation cohort (78.0% with OAC therapy) and the validation cohort (70.5% without OAC therapy). This finding was exaggerated in anticoagulated patients. This is very interesting, because we can identify a group of patients in who the benefit of OAC therapy against embolism is compromised by the increased bleeding risk. In those patients, an alternative strategy should be sought, like LAAC. A meta-analysis of 2 randomized clinical trials (PROTECT AF and PREVAIL) comparing LAAC vs anticoagulation with vitamin K antagonists (VKA) in 2,406 patients at high risk for stroke and increased risk of bleeding, showed a significant reduction of almost 50% in nonprocedural bleeding (15). In turn, LAAC was associated with similar rates of nonprocedural stroke, and resulted in improved rates of hemorrhagic stroke and cardiovascular/unexplained death. Recently, data from PRAGUE-17 showed that among patients at high risk for stroke and increased risk of bleeding, LAAC vs direct oral anticoagulants (DOACs) did not increase the rate of stroke (HR 1.00, 95%CI 0.40-2.51;  $p=0.99$ ), whereas showed a trend to decrease the rate of nonprocedural bleeding (HR 0.53, 95%CI 0.26-1.06;  $p=0.07$ ) (10). Current guidelines state that LAAC may be considered in AF patients with contra-indications for long-term OAC therapy. However, with the results of PROTECT-AF, PREVAIL and PRAGUE-17, it seems reasonable to take a step forward and

286 recommend it in those patients in whom the bleeding risk clearly exceeds the embolic risk. In  
287 this sense, the OAC score can be very useful for clinicians, helping to the incorporation of  
288 transcatheter LAAC into a stroke prevention strategy for patients with an expected excess  
289 bleeding rate. OAC score considers the balance between two key elements: the long-term  
290 risks of thromboembolic events and the longer-term risk of bleeding. However, for derivation  
291 to LAAC, another key element should be considered: the short-term procedure risk of  
292 LAAC(16). With that in mind, the risk benefit of an invasive procedure such as LAAC must  
293 be balanced against the longer-term issues of continued exposure to anticoagulation and  
294 bleeding(17).

295 Other therapeutic option to prevent stroke in patients with high bleeding risk could be Factor  
296 XIa (FXIa) inhibitors. Whether FXIa inhibitors can play a role in this clinical scenario is  
297 currently a pending challenge. FXIa inhibition represents a promising strategy to reduce  
298 stroke risk while preserving a patient's ability to clot when bleeding(18). The recent  
299 PACIFIC-AF trial showed that asundexian –a FXIa inhibitor– resulted in lower rates of  
300 bleeding compared with apixaban in patients with AF, with similar embolic protection(19).  
301 These data support the potential role for FXIa inhibition in patients with AF and make this  
302 strategy a promising avenue pending the results of future studies.

303 On the other hand, a high OAC score identifies patients with a very high embolic risk that  
304 markedly exceeds the expected risk of bleeding events, both in anticoagulated and non-  
305 anticoagulated patients –an aspect that is fulfilled in both derivation and validation cohorts–.  
306 In those patients there is a clear benefit of anticoagulation, and even indefinite OAC with  
307 LAAC could be useful, giving in consideration that the left atrial appendage is responsible for  
308 >90% of embolic strokes(20). Although a targeted approach to exclude this chamber  
309 combined with OAC therapy can be beneficial in those patients at very high embolic risk(21),

310 careful consideration of LAAC warrants an individualized discussion between physician and  
311 patient.

312 **Limitations.** A number of limitations should be considered in interpreting these findings. As  
313 in any observational cohort study, our findings may reflect some degree of residual  
314 confounding. First, as it is not a randomized clinical trial, there is a clear selection bias when  
315 deciding to prescribe OAC. Therefore, these data could only be used to evaluate whether the  
316 score stratified patients according to the balance between embolic and bleeding risk, and not  
317 actual benefit or harm with OAC therapy. The usefulness of the OAC score to support clinical  
318 decision on the prescription of OAC therapy or LAAC should be regarded as hypothesis  
319 generating at this stage and dedicated randomized trials should be carried out to evaluate the  
320 validity of this potential application of the OAC score. Second, variables in the predictive  
321 score included patient characteristics that have demonstrated an association with either  
322 embolic or bleeding events in prior studies. However, common predictive factors for both  
323 embolic and bleeding risks were not included in the predictive score because these factors did  
324 not help identify discordant bleeding and embolic risks. The incorporation of more variables  
325 into the individual bleeding and embolic models may have improved discrimination, at the  
326 expense of parsimony. In addition, the estimation of risks based on the use of the separate  
327 embolic and bleeding model coefficients rather than use of the simplified score could improve  
328 the ability to predict such events and provide the opportunity for clinicians to identify patients  
329 with concordantly high embolic and bleeding risks, in addition to those with discordant risks.  
330 However, we have searched for a simple and user-friendly score that has clinical implications  
331 and widespread use. Third, although there remains a sizable proportion of patients, the  
332 patients used to derive the OAC score make up a group of patients –most of them  
333 anticoagulated– that may not be representative of those seen in clinical practice. However,  
334 validation was performed in a different population of AF patients –most of them non-

335 anticoagulated– with concordant results. Despite our optimism, use of this prediction score  
336 should be cautious until further validation is performed in clinical trials, and optimal clinical  
337 and procedural care to reduce overall bleeding and ischemic risks should be practiced  
338 independent of a patient’s score.

339 In conclusion, we have developed and tested the OAC score, a user-friendly tool to balance  
340 bleeding and embolic risks in AF patients. OAC score is feasible and effective with  
341 potentially important implications on the selection of patients for LAAC.

342

343

344

345

346

347

348

349

350

351

352

353

354

355

356

357

358

359 **Contributors.**

- 360       • SRR, TFC, EAA, and AIR conceived and designed the study.
- 361       • IGF, RGF, YHC, JNL, and LK a did the analysis.
- 362       • SRR, EAA and TFC drafted the manuscript.
- 363       • All authors revised and approved the final version of the manuscript.
- 364       • SRR and EAA had full access to all of the data in the study and take responsibility for
- 365       the integrity of the data and the accuracy of the data analysis.

366

367 **Declaration of interest.**

- 368       • SRR has received honoraria for presentations and advisory boards from Amgen,
- 369       Abbott, Sanofi, AstraZeneca, Daichii, Pfyzer-BMS, Bayer, and Boehringer.
- 370       • The rest of authors declare no competing interests.

371

372 **Founding source**

- 373       • The electronic registry was funded in a unconditioned way by Daiichi Sankyo, Pfyzer-
- 374       BMS, Bayer and Boehringer Ingelheim.

375

376 **Acknowledgment**

- 377       • None.

378

379 **Data sharing.**

- 380       • Due to different data-sharing policies of the two datasets included in this study, not all
- 381       of which provided free access to data, data included in this study will not be made



382 available. Requests for the data from each included dataset should be made to the  
383 corresponding author of each single registry.

## 384 REFERENCES

385

386 1. Hindricks G, Potpara T, Dagres N, et al. 2020 ESC Guidelines for the diagnosis and  
387 management of atrial fibrillation developed in collaboration with the European Association  
388 for Cardio-Thoracic Surgery (EACTS): The Task Force for the diagnosis and management of  
389 atrial fibrillation of the European Society of Cardiology (ESC) Developed with the special  
390 contribution of the European Heart Rhythm Association (EHRA) of the ESC. *Eur Heart J*.  
391 2021;42(5):373-498.

392 2. January CT, Wann LS, Calkins H, et al. 2019 AHA/ACC/HRS Focused Update of the  
393 2014 AHA/ACC/HRS Guideline for the Management of Patients With Atrial Fibrillation: A  
394 Report of the American College of Cardiology/American Heart Association Task Force on  
395 Clinical Practice Guidelines and the Heart Rhythm Society in Collaboration With the Society  
396 of Thoracic Surgeons. *Circulation*. 2019;140(2):e125-e51.

397 3. Lip GYH, Banerjee A, Boriani G, et al. Antithrombotic Therapy for Atrial Fibrillation:  
398 CHEST Guideline and Expert Panel Report. *Chest*. 2018;154(5):1121-201.

399 4. Kirchhof P, Ammentorp B, Darius H, et al. Management of atrial fibrillation in seven  
400 European countries after the publication of the 2010 ESC Guidelines on atrial fibrillation:  
401 primary results of the PREvention of thromboembolic events--European Registry in Atrial  
402 Fibrillation (PREFER in AF). *Europace*. 2014;16(1):6-14.

403 5. Martin A, Siegal D, Verbrugge F, et al. Why do clinicians withhold anticoagulation in  
404 patients with atrial fibrillation and CHA<sub>2</sub>DS<sub>2</sub>-VASc score $\geq$ 2? *Arch Card Dis Suppl*.  
405 2019;11(1):83-4.

- 406 6. Lubitz SA, Khurshid S, Weng LC, et al. Predictors of oral anticoagulant non-  
407 prescription in patients with atrial fibrillation and elevated stroke risk. *Am Heart J.*  
408 2018;200:24-31.
- 409 7. Piazza G, Hurwitz S, Carroll B, Goldhaber SZ. Patients with perceived high-bleeding  
410 risk and computerized decision support for stroke prevention in atrial fibrillation: an AF-  
411 ALERT substudy : Piazza: outcomes of high-bleeding risk AF patients. *J Thromb*  
412 *Thrombolysis.* 2021;52(1):281-90.
- 413 8. Edmiston MK, Lewis WR. Bleeding Risk Scores in Atrial Fibrillation: Helpful or  
414 Harmful? *JAHA.* 2018;7(18):e010582.
- 415 9. Raposeiras-Roubín S, Abu-Assi E, Cespón Fernández M, et al. Trade-off between the  
416 effects of embolic versus bleeding events on mortality in elderly patients with atrial  
417 fibrillation. *Rev Esp Cardiol (Engl Ed).* 2022;75(4):334-42.
- 418 10. Osmancik P, Herman D, Neuzil P, et al. Left Atrial Appendage Closure Versus Direct  
419 Oral Anticoagulants in High-Risk Patients With Atrial Fibrillation. *J Am Coll Cardiol.*  
420 2020;75(25):3122-35.
- 421 11. Raposeiras-Roubin S, Abu-Assi E, Marchán A, et al. Validation of Embolic and  
422 Bleeding Risk Scores in Patients With Atrial Fibrillation and Cancer. *Am J Cardiol.*  
423 2022;180:44-51.
- 424 12. Hicks KA, Mahaffey KW, Mehran R, et al. 2017 Cardiovascular and Stroke Endpoint  
425 Definitions for Clinical Trials. *Circulation.* 2018;137(9):961-72.
- 426 13. Schulman S, Angerås U, Bergqvist D, Eriksson B, Lassen MR, Fisher W. Definition  
427 of major bleeding in clinical investigations of antihemostatic medicinal products in surgical  
428 patients. *J Thromb Haemost.* 2010;8(1):202-4.

- 429 14. Chao TF, Liu CJ, Wang KL, et al. Should atrial fibrillation patients with 1 additional  
430 risk factor of the CHA<sub>2</sub>DS<sub>2</sub>-VASc score (beyond sex) receive oral anticoagulation? *J Am*  
431 *Coll Cardiol.* 2015;65(7):635-42.
- 432 15. Holmes DR, Jr., Doshi SK, Kar S, et al. Left Atrial Appendage Closure as an  
433 Alternative to Warfarin for Stroke Prevention in Atrial Fibrillation: A Patient-Level Meta-  
434 Analysis. *J Am Coll Cardiol.* 2015;65(24):2614-23.
- 435 16. Murtaza G, Boda U, Turagam MK, et al. Risks and Benefits of Removal of the Left  
436 Atrial Appendage. *Curr Cardiol Rep.* 2020;22(11):129.
- 437 17. Holmes DR, Reddy VY, Turi ZG, et al. Percutaneous closure of the left atrial  
438 appendage versus warfarin therapy for prevention of stroke in patients with atrial fibrillation:  
439 a randomised non-inferiority trial. *Lancet.* 2009;374(9689):534-42.
- 440 18. Liuzzo G, Patrono C. A novel inhibitor of Factor XIa as potential haemostasis-sparing  
441 anticoagulant for patients with atrial fibrillation. *Eur Heart J.* 2022;43(25):2354-5.
- 442 19. Piccini JP, Caso V, Connolly SJ, et al. Safety of the oral factor XIa inhibitor  
443 asundexian compared with apixaban in patients with atrial fibrillation (PACIFIC-AF): a  
444 multicentre, randomised, double-blind, double-dummy, dose-finding phase 2 study. *Lancet.*  
445 2022;399(10333):1383-90.
- 446 20. Collado FMS, Buchwald CMLV, Anderson CK, et al. Left Atrial Appendage  
447 Occlusion for Stroke Prevention in Nonvalvular Atrial Fibrillation. *JAHA.*  
448 2021;10(21):e022274.
- 449 21. Freixa X, Cruz-González I, Regueiro A, et al. Left Atrial Appendage Occlusion as  
450 Adjunctive Therapy to Anticoagulation for Stroke Recurrence. *J Invasive Cardiol.*  
451 2019;31(8):212-6.

452

453

454

455

456

## TABLES

457 **Table 1.** Baseline characteristics of patients with vs without ischemic stroke or major

458 bleeding during the follow-up in the derivation cohort (n = 14,915)

| Measure                         | Ischemic stroke, No. (%) |                        |            | Major bleeding, No. (%) |                        |            |
|---------------------------------|--------------------------|------------------------|------------|-------------------------|------------------------|------------|
|                                 | Event<br>(n=801)         | No Event<br>(n=14,114) | P<br>Value | Event<br>(n=1,247)      | No Event<br>(n=13,668) | P<br>Value |
| <b>Demographic</b>              |                          |                        |            |                         |                        |            |
| Age, men (SD)                   | 79.8 (8.7)               | 77.0 (9.5)             | <0.001     | 77.1 (8.4)              | 77.2 (9.6)             | 0.769      |
| Age, groups                     |                          |                        | <0.001     |                         |                        | <0.001     |
| <60                             | 23 (2.9)                 | 711 (5.0)              |            | 35 (2.8)                | 699 (5.1)              |            |
| 60-69.9                         | 77 (9.6)                 | 2,420 (17.1)           |            | 215 (17.2)              | 2,282 (16.7)           |            |
| 70-79.9                         | 259 (32.3)               | 4,935 (35.0)           |            | 508 (40.7)              | 4,686 (34.3)           |            |
| 80-89.9                         | 367 (45.8)               | 5,237 (37.1)           |            | 403 (32.3)              | 5,201 (38.1)           |            |
| >=90                            | 75 (9.4)                 | 811 (5.7)              |            | 86 (6.9)                | 800 (5.9)              |            |
| Women                           | 471 (57.9)               | 7,528 (50.6)           | <0.001     | 539 (42.6)              | 7,460 (51.7)           | <0.001     |
| Overweight/obesity              | 677 (84.5)               | 11,932 (84.5)          | 0.987      | 1,061 (85.1)            | 11,548 (84.5)          | 0.578      |
| <b>Medical history</b>          |                          |                        |            |                         |                        |            |
| Cigarette smoker                | 34 (4.2)                 | 595 (4.2)              | 0.968      | 74 (5.9)                | 555 (4.1)              | 0.002      |
| Alcohol abuse <sup>a</sup>      | 129 (16.1)               | 2,578 (18.3)           | 0.123      | 291 (23.3)              | 2,416 (17.7)           | <0.001     |
| Hypertension                    | 596 (74.4)               | 10,669 (75.6)          | 0.448      | 931 (74.7)              | 10,334 (75.6)          | 0.456      |
| Dyslipemia                      | 385 (48.1)               | 6,896 (48.9)           | 0.662      | 612 (49.1)              | 6,669 (48.8)           | 0.848      |
| Diabetes mellitus               | 172 (21.5)               | 2,847 (20.2)           | 0.372      | 303 (24.3)              | 2,716 (19.9)           | <0.001     |
| Peripheral artery disease       | 35 (4.4)                 | 522 (3.7)              | 0.330      | 54 (4.3)                | 503 (3.7)              | 0.246      |
| Prior stroke                    | 95 (11.9)                | 899 (6.4)              | <0.001     | 75 (6.0)                | 919 (6.7)              | 0.336      |
| Coronary artery disease         | 91 (11.4)                | 1,544 (10.9)           | 0.710      | 156 (12.5)              | 1,479 (10.8)           | 0.068      |
| Prior heart failure             | 76 (9.5)                 | 1,196 (8.5)            | 0.317      | 125 (10.0)              | 1,147 (8.4)            | 0.048      |
| LVEF ≤ 40%                      | 46 (5.9)                 | 771 (5.7)              | 0.807      | 72 (5.9)                | 745 (5.7)              | 0.680      |
| Moderate-severe aortic stenosis | 42 (5.2)                 | 511 (3.6)              | 0.018      | 78 (6.3)                | 475 (3.5)              | <0.001     |
| Moderate-severe MR              | 30 (3.7)                 | 479 (3.4)              | 0.594      | 60 (4.8)                | 449 (3.3)              | 0.004      |
| Bioprosthesis                   | 13 (1.6)                 | 146 (1.0)              | 0.115      | 22 (1.8)                | 137 (1.0)              | 0.012      |
| HCM                             | 15 (1.9)                 | 169 (1.2)              | 0.092      | 20 (1.6)                | 164 (1.2)              | 0.216      |
| Pacemaker                       | 43 (5.4)                 | 727 (5.2)              | 0.787      | 84 (6.7)                | 686 (5.0)              | 0.009      |
| COPD                            | 86 (10.7)                | 1,641 (11.6)           | 0.444      | 144 (11.5)              | 1,583 (11.6)           | 0.971      |
| Kidney disease <sup>b</sup>     |                          |                        | 0.009      |                         |                        | <0.001     |
| Stage 1                         | 94 (11.7)                | 2,267 (16.1)           |            | 186 (14.9)              | 2,175 (15.9)           |            |
| Stage 2                         | 440 (54.9)               | 7,674 (54.4)           |            | 640 (51.3)              | 7,474 (54.7)           |            |
| Stage 3a                        | 147 (18.4)               | 2,392 (16.9)           |            | 228 (18.3)              | 2,311 (16.9)           |            |
| Stage 3b                        | 93 (11.6)                | 1,282 (9.1)            |            | 123 (9.9)               | 1,252 (9.2)            |            |
| Stage 4                         | 23 (2.9)                 | 418 (3.0)              |            | 52 (4.2)                | 389 (2.8)              |            |
| Stage 5                         | 4 (0.5)                  | 81 (0.6)               |            | 18 (1.4)                | 67 (0.5)               |            |

|                                                      |            |               |        |              |               |        |
|------------------------------------------------------|------------|---------------|--------|--------------|---------------|--------|
| Liver disease <sup>c</sup>                           |            |               | 0.281  |              |               | <0.001 |
| Mild liver disease                                   | 10 (1.2)   | 279 (2.0)     |        | 45 (3.6)     | 244 (1.8)     |        |
| Cirrhosis                                            | 7 (0.9)    | 157 (1.1)     |        | 31 (2.5)     | 133 (1.0)     |        |
| Anemia <sup>d</sup>                                  |            |               | 0.948  |              |               | <0.001 |
| Mild                                                 | 102 (12.7) | 1,798 (12.7)  |        | 221 (17.7)   | 1,679 (12.3)  |        |
| Moderate-severe                                      | 19 (2.4)   | 361 (2.4)     |        | 63 (5.1)     | 317 (2.3)     |        |
| Thrombopenia <sup>e</sup>                            |            |               | 0.127  |              |               | 0.002  |
| Mild                                                 | 68 (8.5)   | 1,496 (10.6)  |        | 158 (12.7)   | 1,406 (10.3)  |        |
| Moderate-severe                                      | 7 (0.9)    | 159 (1.1)     |        | 22 (1.8)     | 144 (1.1)     |        |
| Prior bleeding admission                             | 44 (5.5)   | 751 (5.3)     | 0.833  | 100 (8.0)    | 695 (5.1)     | <0.001 |
| History of GI ulcer                                  | 10 (1.2)   | 139 (1.0)     | 0.466  | 19 (1.5)     | 130 (1.0)     | 0.052  |
| Corticosteroid/NSAID use                             | 122 (15.3) | 2,425 (17.2)  | 0.158  | 241 (19.3)   | 2,306 (16.9)  | 0.028  |
| History of past cancer <sup>f</sup>                  | 34 (4.2)   | 1,092 (7.3)   | 0.001  | 100 (7.9)    | 1,026 (7.1)   | 0.294  |
| Active cancer <sup>f</sup>                           | 11 (1.4)   | 317 (2.2)     | 0.101  | 31 (2.5)     | 297 (2.2)     | 0.463  |
| Prior radiotherapy                                   | 11 (1.4)   | 319 (2.3)     | 0.097  | 34 (2.7)     | 296 (2.2)     | 0.193  |
| Prior chemotherapy                                   | 8 (1.0)    | 214 (1.5)     | 0.239  | 15 (1.2)     | 207 (1.5)     | 0.389  |
| Cognitive impairment <sup>g</sup>                    | 101 (12.6) | 1,117 (7.9)   | <0.001 | 139 (11.1)   | 1,079 (7.9)   | <0.001 |
| Parkinson disease                                    | 16 (2.0)   | 248 (1.8)     | 0.616  | 27 (2.2)     | 237 (1.7)     | 0.269  |
| Moderate-severe malnutrition <sup>h</sup>            | 48 (6.0)   | 733 (5.2)     | 0.323  | 92 (7.4)     | 689 (5.0)     | 0.001  |
| <b>AF type and management</b>                        |            |               |        |              |               |        |
| AF type                                              |            |               | <0.001 |              |               | <0.001 |
| Paroxysmal                                           | 114 (14.2) | 2,379 (16.9)  |        | 160 (13.0)   | 2,333 (17.1)  |        |
| Persistent                                           | 96 (12.0)  | 3,068 (21.7)  |        | 239 (19.5)   | 2,925 (21.4)  |        |
| Permanent                                            | 591 (73.8) | 8,667 (61.4)  |        | 848 (67.5)   | 8,410 (61.5)  |        |
| CHA <sub>2</sub> DS <sub>2</sub> -VASC score, points | 3.8 (1.4)  | 3.4 (1.3)     | <0.001 | 3.4 (1.3)    | 3.4 (1.4)     | 0.924  |
| HASBLED score, points                                | 2.8 (1.1)  | 2.7 (1.1)     | 0.204  | 3.0 (1.2)    | 2.7 (1.1)     | <0.001 |
| <b>Antithrombotic therapy</b>                        |            |               |        |              |               |        |
| Anticoagulation therapy                              | 584 (72.9) | 11,048 (78.3) | <0.001 | 1,058 (84.8) | 10,574 (77.4) | <0.001 |
| Antiplatelet therapy                                 | 194 (24.2) | 2,701 (19.1)  | <0.001 | 220 (17.6)   | 2,675 (19.6)  | 0.099  |

459

460 AF: Atrial Fibrillation; COPD: Chronic Obstructive Pulmonary Disease; GI: Gastrointestinal; HCM:  
 461 Hypertrophic Cardiomyopathy; LVEF: Left Ventricular Ejection Fraction; MR: Mitral Regurgitation; NSAID:  
 462 Non-Steroidal Anti-Inflammatory Drugs; SD: Standard Deviation.

463 <sup>a</sup> Defined by National Institute on Alcohol Abuse and Alcoholism as consuming  $\geq 4$  alcoholic drinks on any day or  $\geq 14$  alcoholic  
 464 drinks per week for men, or consuming  $\geq 3$  alcoholic drinks on any day or  $\geq 7$  alcoholic drinks per week for women, in the past  
 465 month.

466 <sup>b</sup> Categories of chronic kidney disease according to the National Kidney Foundation classification, using the Chronic Kidney  
 467 Disease Epidemiology Collaboration (CKD-EPI) equation to estimate the glomerular filtrate rate

468 <sup>c</sup> Mild liver disease was defined as elevations of aspartate transaminase (AST) and/or alanine transaminase (ALT) more than 3  
 469 times the upper limit of normal. Cirrhosis was defined by clinical, biochemical, and radiological parameters, endoscopic results,  
 470 ultrasonography, and/or even histology.

471 <sup>d</sup> Anemia was defined According to the World Health Organization as hemoglobin levels  $< 12.0$  g/dL in women and  $< 13.0$  g/dL  
 472 in men. Moderate-severe anemia was defined as hemoglobin levels  $< 10$  g/dL.

473 <sup>e</sup> Thrombopenia was subdivided into mild (platelet count 100,000 to 150,000/microL) and moderate-severe ( $< 100,000$ /microL)

474 <sup>f</sup> Active cancer was defined according to the last definition proposed by the Scientific and Standardization Committee of the  
 475 International Society on Thrombosis and Haemostasis, as cancer diagnosed within the 6 months before the medical evaluation for  
 476 AF, cancer with local progression, metastasis, or lack of complete remission in the last 6 months, as well as patients receiving  
 477 specific cancer therapy within the previous 6 months

478 <sup>§</sup> Equivalent to moderate-to-severe dementia, defined as cognitive decline between stages 5 and 7 of the Reisberg Global  
 479 Deterioration Scale, which corresponds to stages of the Functional Assessment Staging scale 5  
 480 <sup>h</sup> Based on a CONUT (Controlling Nutritional status) score 5 points.  
 481  
 482

483 **Table 2.** Ischemic stroke prediction model and major bleeding prediction model.

| Predictors of Events                     | Predictor of ischemic stroke                               |         | Predictor of major bleeding                                |         |
|------------------------------------------|------------------------------------------------------------|---------|------------------------------------------------------------|---------|
|                                          | HR (95% CI)                                                | P Value | HR (95% CI)                                                | P Value |
| Age, per year                            | 1.06 (1.05-1.07)                                           | <0.001  | 1.02 (1.01-1.03)                                           | <0.001  |
| Female sex                               |                                                            |         | 0.70 (0.61-0.78)                                           | <0.001  |
| Cigarette smoker                         |                                                            |         | 1.40 (1.10-1.79)                                           | 0.008   |
| Alcohol abuse <sup>a</sup>               |                                                            |         | 1.17 (1.01-1.35)                                           | 0.036   |
| Diabetes mellitus                        |                                                            |         | 1.21 (1.06-1.39)                                           | 0.004   |
| Prior stroke                             | 1.92 (1.54-2.38)                                           | <0.001  |                                                            |         |
| Moderate-severe aortic stenosis          | 1.50 (1.08-2.07)                                           | 0.014   | 1.56 (1.22-1.99)                                           | <0.001  |
| Moderate-severe MR                       |                                                            |         | 1.33 (1.02-1.73)                                           | 0.032   |
| HCM                                      | 1.69 (1.01-2.82)                                           | 0.044   |                                                            |         |
| CKD <sup>b</sup>                         |                                                            |         | Ref                                                        | Ref     |
| Stage 1                                  |                                                            |         |                                                            |         |
| Stage 2                                  |                                                            |         | 0.92 (0.77-1.10)                                           | 0.342   |
| Stage 3a                                 |                                                            |         | 1.04 (0.84-1.30)                                           | 0.691   |
| Stage 3b                                 |                                                            |         | 1.05 (0.82-1.35)                                           | 0.702   |
| Stage 4                                  |                                                            |         | 1.47 (1.05-2.04)                                           | 0.024   |
| Stage 5                                  |                                                            |         | 2.62 (1.59-4.33)                                           | <0.001  |
| Non cirrhotic Liver disease <sup>c</sup> |                                                            |         | 1.51 (1.12-2.04)                                           | 0.007   |
| Cirrhosis <sup>c</sup>                   |                                                            |         | 2.40 (1.65-3.50)                                           | <0.001  |
| Mild Anemia <sup>d</sup>                 |                                                            |         | 1.73 (1.48-2.02)                                           | <0.001  |
| Moderate-severe Anemia <sup>d</sup>      |                                                            |         | 2.47 (1.88-3.25)                                           | <0.001  |
| Prior bleeding admission                 |                                                            |         | 1.55 (1.26-1.91)                                           | <0.001  |
| Prior GI ulcer                           |                                                            |         | 1.64 (1.04-2.58)                                           | 0.034   |
| Cognitive impairment <sup>e</sup>        | 1.40 (1.20-1.83)                                           | <0.001  | 1.41 (1.18-1.69)                                           | <0.001  |
| Malnutrition <sup>f</sup>                |                                                            |         | 1.30 (1.03-1.63)                                           | 0.025   |
| Permanent AF                             | 1.60 (1.35-1.89)                                           | <0.001  | 1.23 (1.08-1.39)                                           | 0.001   |
| Corticosteroid/NSAID                     |                                                            |         | 1.23 (1.07-1.42)                                           | 0.004   |
| Anticoagulation                          | 0.70 (0.56-0.86)                                           | <0.001  | 1.64 (1.36-1.99)                                           | <0.001  |
| Predictive ability of the model          | Harrel C-Index 0.687<br>Grønnesby and Borgan P-value=0.116 |         | Harrel C-Index 0.671<br>Grønnesby and Borgan P-value=0.549 |         |

484  
 485 AF: Atrial Fibrillation; CKD: Chronic Kidney Disease; GI: Gastrointestinal; HCM: Hypertrophic  
 486 Cardiomyopathy; HR: Hazard Ratio; MR: Mitral Regurgitation; NSAID: Non-Steroidal Anti-Inflammatory  
 487 Drugs.

488 <sup>a</sup> Defined by National Institute on Alcohol Abuse as consuming  $\geq 4$  alcoholic drinks on any day or  $\geq 14$  alcoholic drinks per week  
 489 for men, or consuming  $\geq 3$  alcoholic drinks on any day or  $\geq 7$  alcoholic drinks per week for women, in the past month.

490 <sup>b</sup> Categories of chronic kidney disease according to the National Kidney Foundation classification, using the Chronic Kidney  
 491 Disease Epidemiology Collaboration (CKD-EPI) equation to estimate the glomerular filtrate rate

492 <sup>c</sup> Mild liver disease was defined as elevations of aspartate transaminase (AST) and/or alanine transaminase (ALT) more than 3  
 493 times the upper limit of normal. Cirrhosis was defined by clinical, biochemical, and radiological parameters, endoscopic results,  
 494 ultrasonography, and/or even histology.

495 <sup>d</sup> Anemia was defined According to the World Health Organization as hemoglobin levels < 12.0 g/dL in women and < 13.0 g/dL  
496 in men. Moderate-severe anemia was defined as hemoglobin levels < 10 g/dL.  
497 <sup>e</sup> Equivalent to moderate-to-severe dementia, defined as cognitive decline between stages 5 and 7 of the Reisberg Global  
498 Deterioration Scale, which corresponds to stages of the Functional Assessment Staging scale 5  
499 <sup>f</sup> Based on a CONUT (Controlling Nutritional status) score 5 points.

500 **FIGURES**

501 **Figure 1.** Distribution of OAC score among patients of derivation cohort (n = 14,915) with  
502 annual incidence of events according to risk score groups.

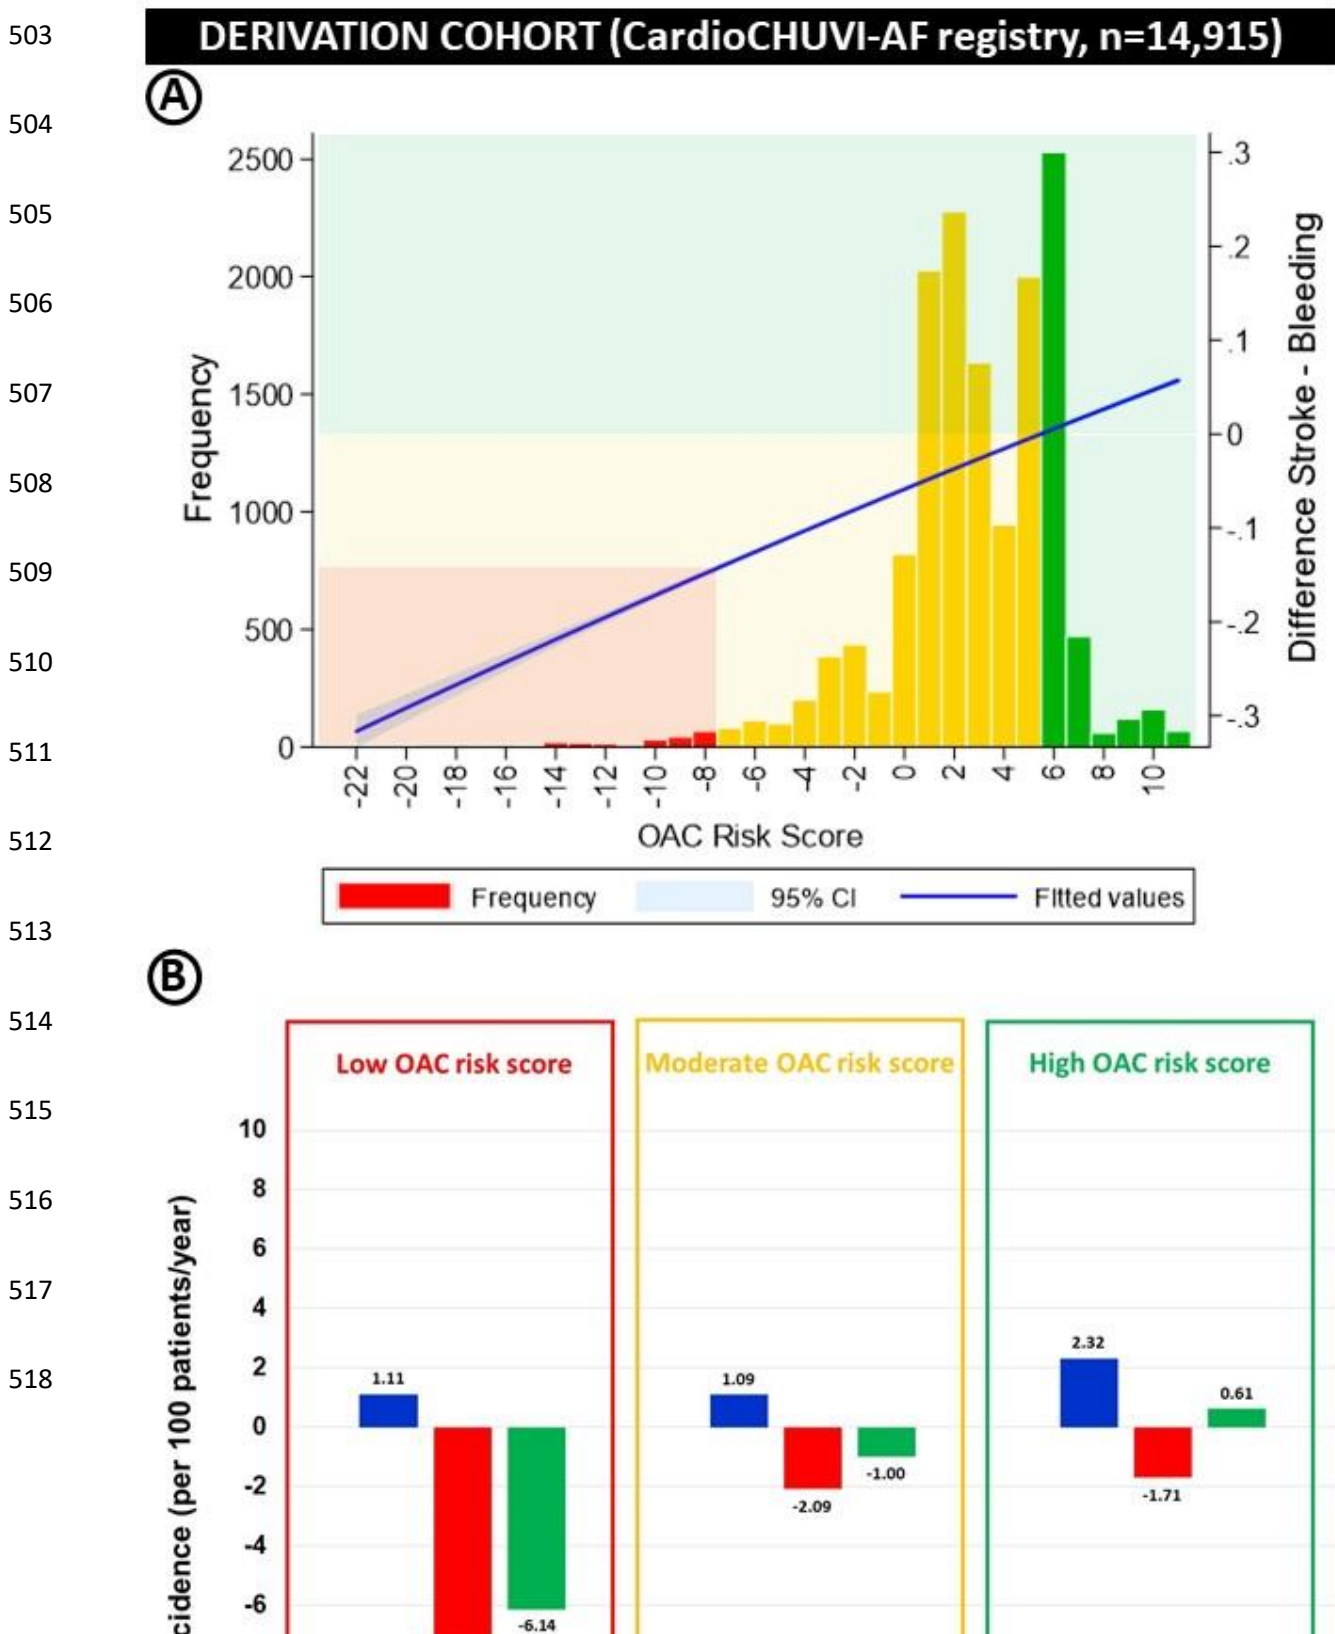

519

520

521 **Figure 2.** Observed rates of embolic (A) and bleeding (B) outcomes during the follow-up by

522 OAC score groups in derivation cohort.

523

**DERIVATION COHORT (CardioCHUVI-AF registry, n=14,915)**

524

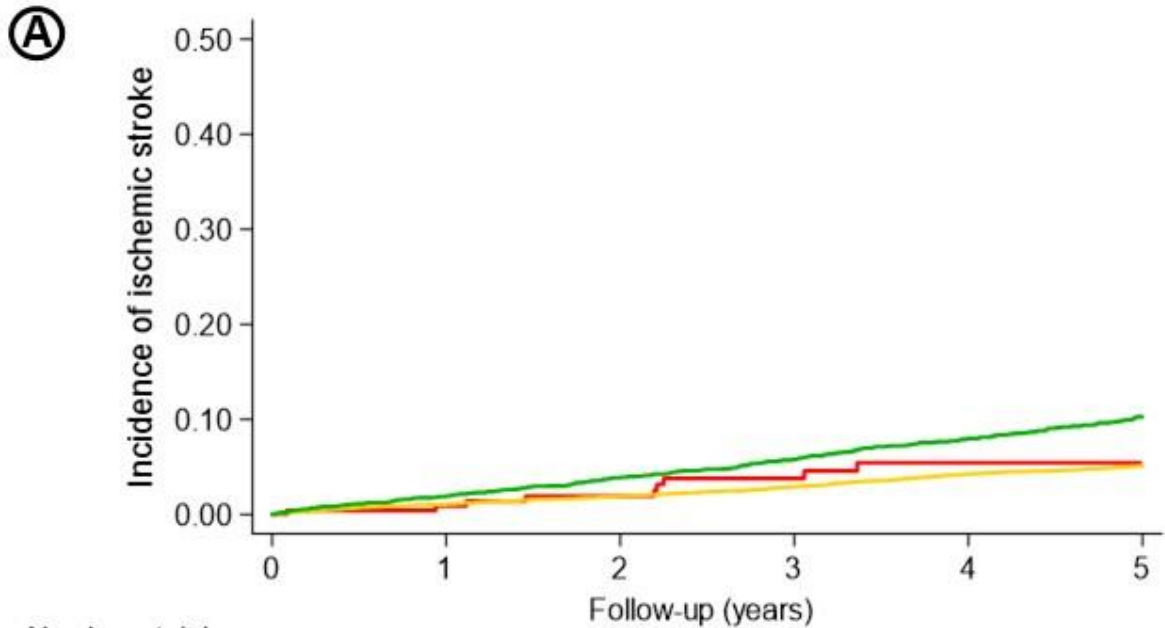

Number at risk

|                |       |       |      |      |      |      |
|----------------|-------|-------|------|------|------|------|
| Low score      | 242   | 203   | 166  | 128  | 88   | 67   |
| Moderate score | 11264 | 10484 | 9277 | 7934 | 6583 | 5247 |
| High score     | 3409  | 3066  | 2534 | 2034 | 1590 | 1010 |

532

— Low score — Moderate score — High score

533

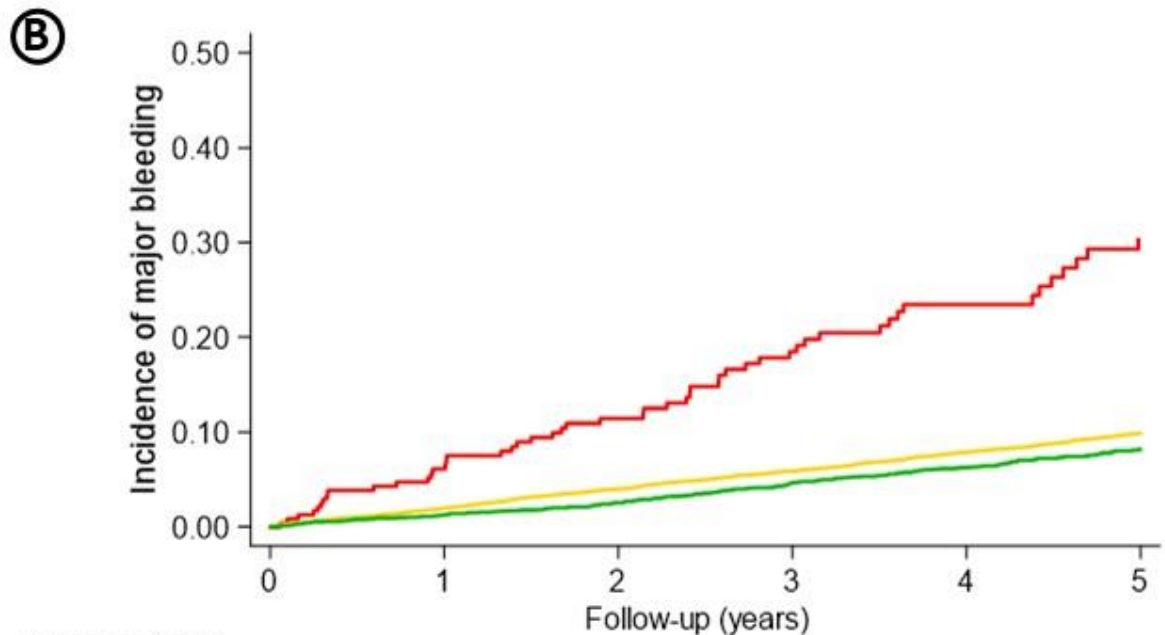

Number at risk

|                |       |       |      |      |      |      |
|----------------|-------|-------|------|------|------|------|
| Low score      | 242   | 203   | 166  | 128  | 88   | 67   |
| Moderate score | 11264 | 10484 | 9277 | 7934 | 6583 | 5247 |
| High score     | 3409  | 3066  | 2534 | 2034 | 1590 | 1010 |



540

541

542 **Figure 3.** Balance between embolic and bleeding outcomes in anticoagulated and non-  
 543 anticoagulated patients according to OAC score groups in both derivation and validation  
 544 cohorts.

545

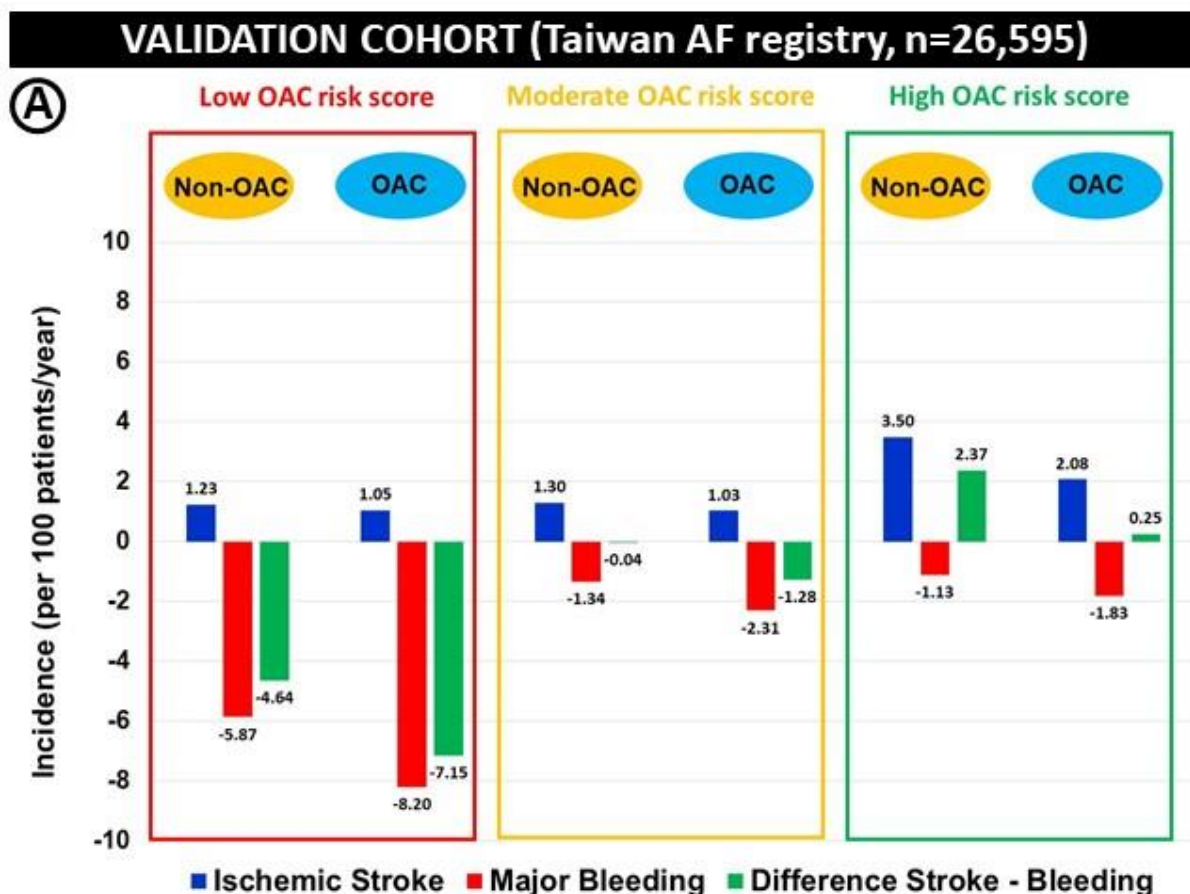

555

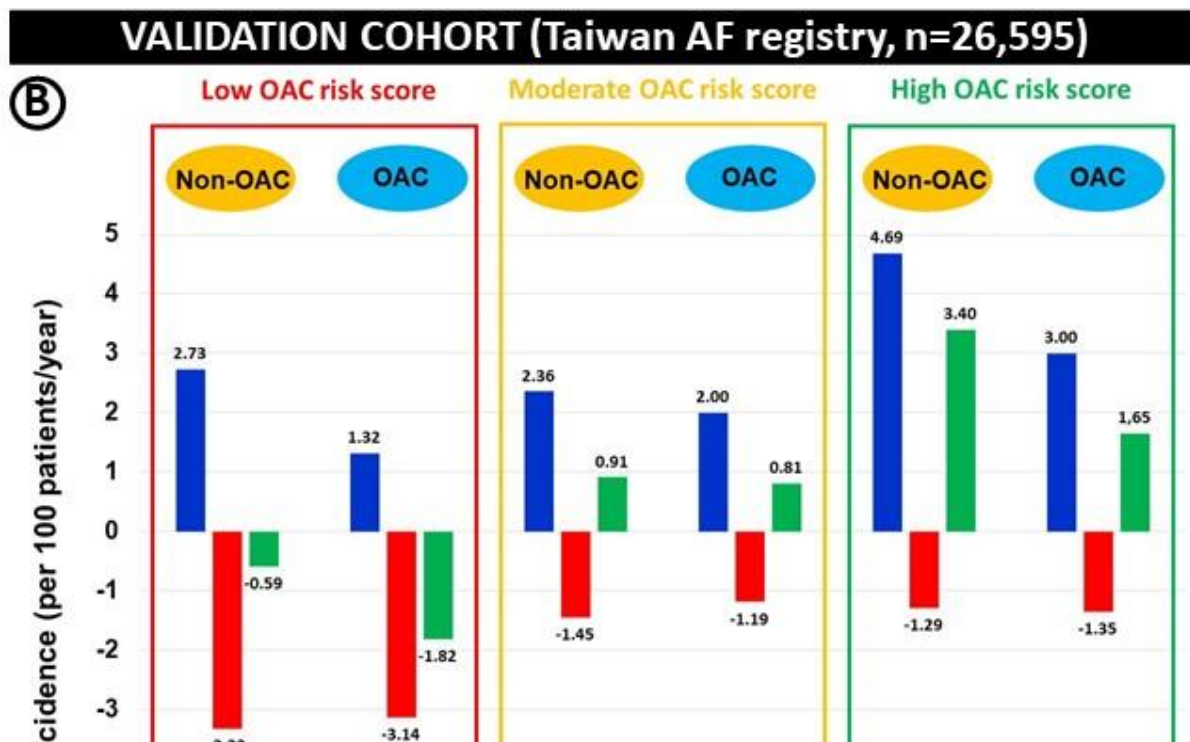

556

557

558

559

560

561

562

563 **Figure 4.** Distribution of OAC score among patients of validation cohort (n = 26,595) with  
564 annual incidence of events according to risk score groups.

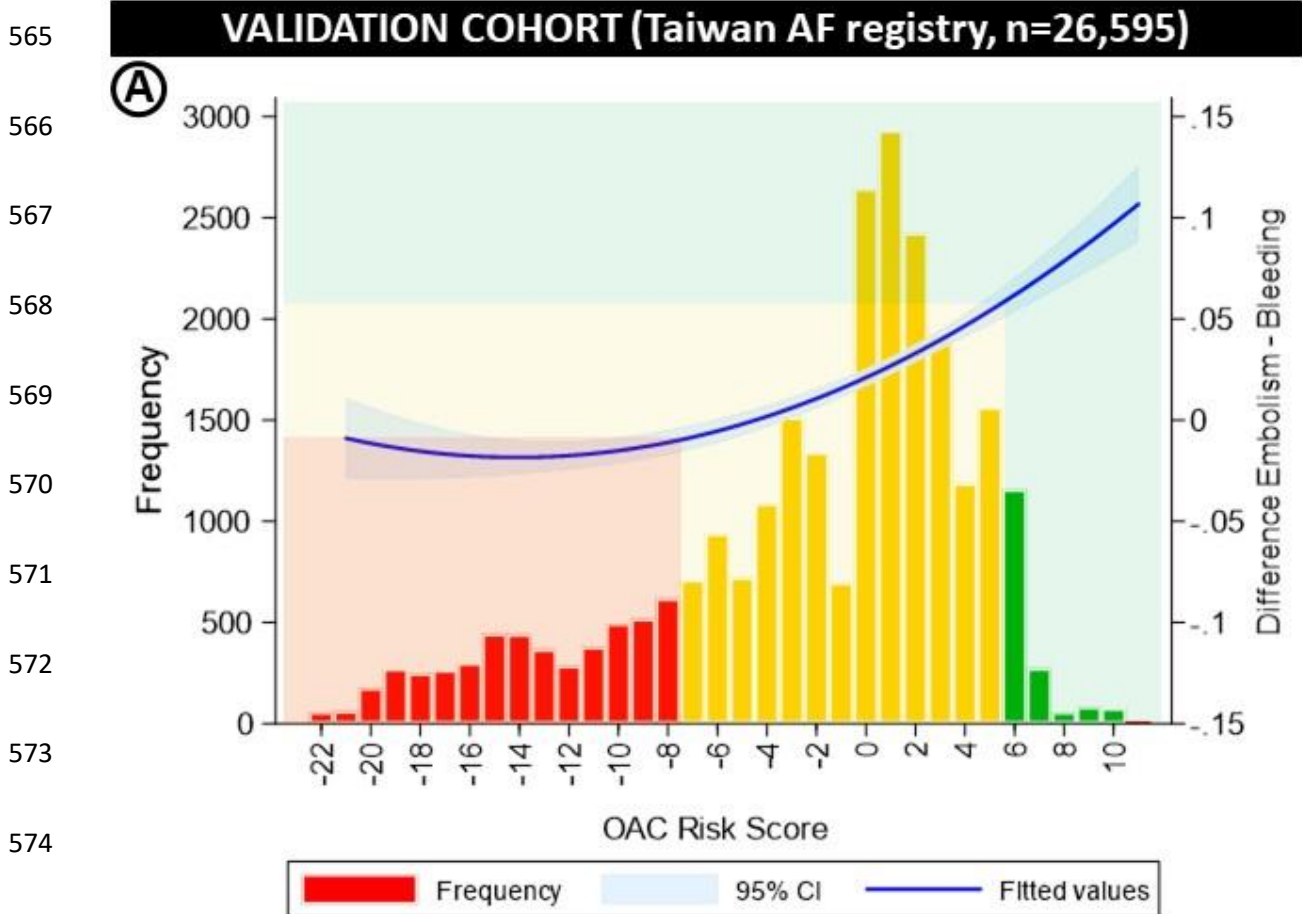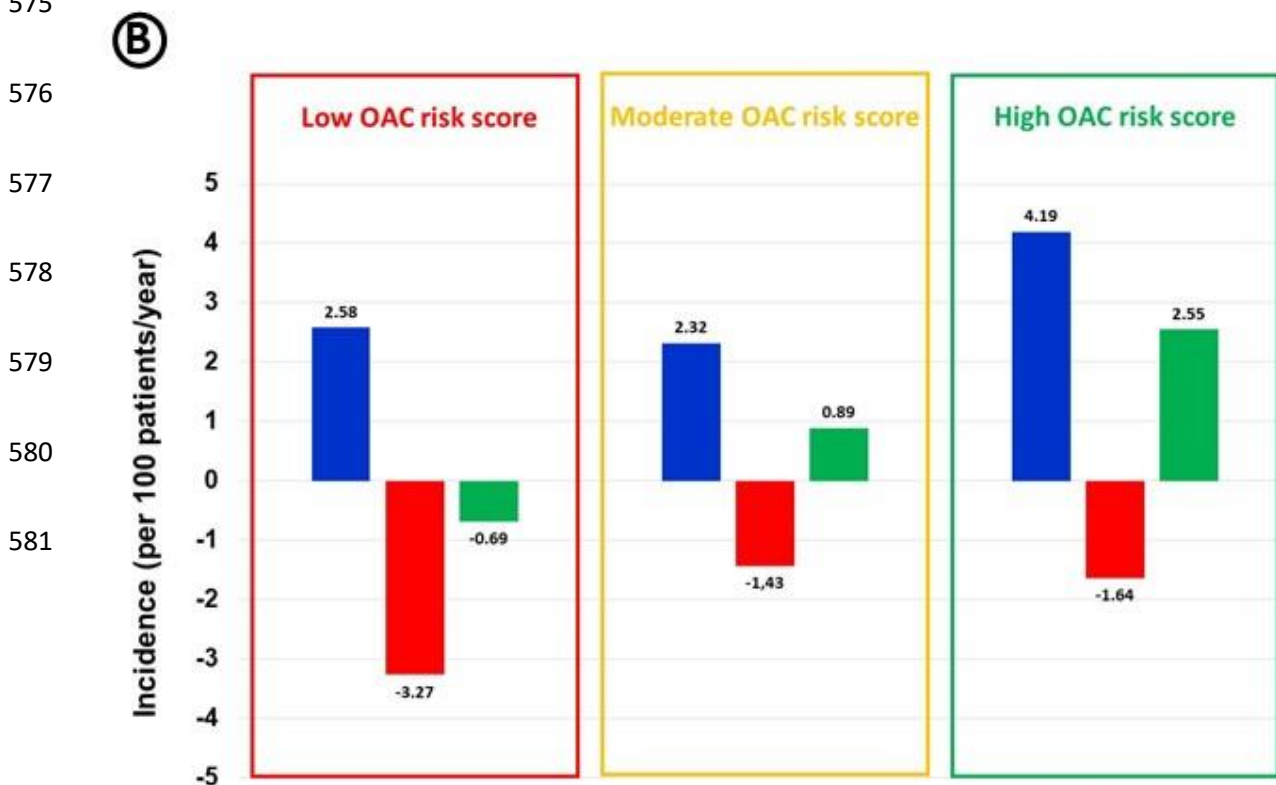

582

583

584 **Figure 5.** Observed rates of embolic (A) and bleeding (B) outcomes during the follow-up by

585 OAC score groups in validation cohort.

586

**VALIDATION COHORT (Taiwan AF registry, n=26,595)**

587

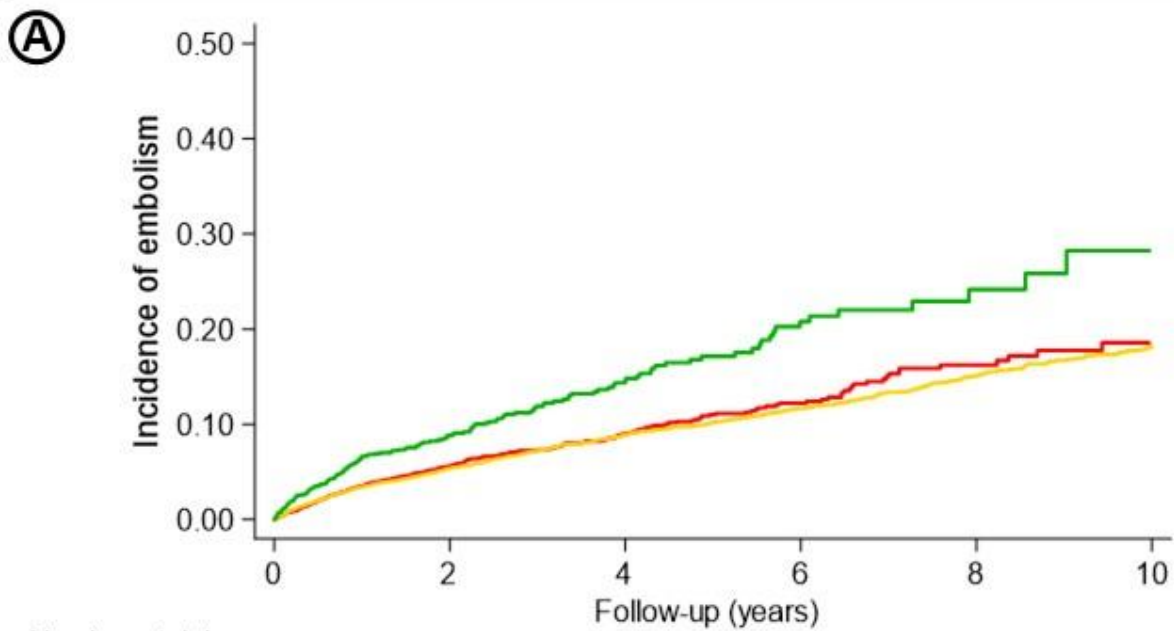

Number at risk

|                |       |      |      |      |      |     |
|----------------|-------|------|------|------|------|-----|
| Low score      | 6893  | 2153 | 1007 | 465  | 198  | 74  |
| Moderate score | 18041 | 8639 | 4981 | 2691 | 1254 | 577 |
| High score     | 1661  | 733  | 351  | 147  | 59   | 18  |

— Low score — Moderate score — High score

589

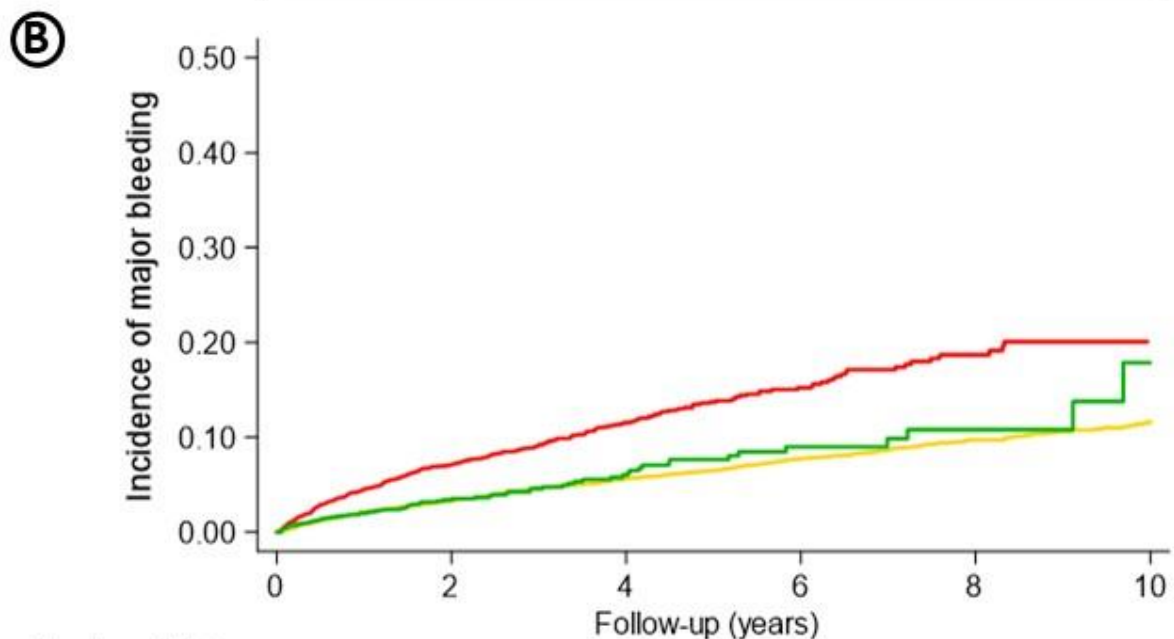

Number at risk

|                |       |      |      |      |      |     |
|----------------|-------|------|------|------|------|-----|
| Low score      | 6893  | 2090 | 975  | 450  | 193  | 71  |
| Moderate score | 18041 | 8811 | 5121 | 2786 | 1325 | 627 |
| High score     | 1661  | 780  | 383  | 163  | 62   | 18  |
